# Supplementary material
Source: Springer Nature journal article supplement (https://www.springermedizin.de/resource/supplementary/13058_2012_3227_MOESM7_ESM.pdf/9703542)
Supplement: MOESM7 [file 9703542]

**A** SCF expression on tumors from arthritic versus non-arthritic BC models

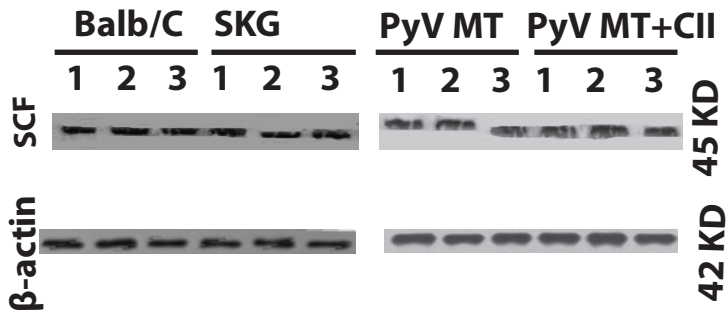

**B** SCF expression on in vitro breast cancer cell lines

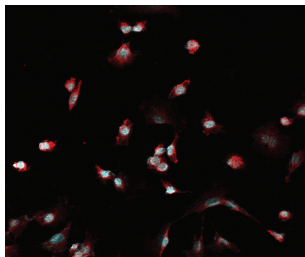

4T1 cells

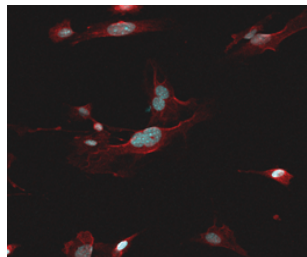

PyV MT cells
